# Supplementary material for: Pressure-induced amorphous-to-amorphous configuration change in Ca-Al metallic glasses
Source: PubMed Central journal article supplement — Sci Rep. 2012 Apr 23;2:376. doi: 10.1038/srep00376 (PMC3332524; doi:10.1038/srep00376), 2012-04-23
Supplement: srep00376-s1.pdf [file srep00376-s1.pdf]

# **Supplementary Information for**

Pressure-induced amorphous-to-amorphous configuration change in

Ca-Al metallic glasses

H.B. Lou, Y.K. Fang, Q.S. Zeng, Y.H. Lu, X.D. Wang, Q.P. Cao, K. Yang, X.H. Yu, L.

Zheng, Y.D. Zhao, W.S. Chu, T.D. Hu, Z.Y. Wu, R. Ahuja and J.Z. Jiang\*

\* To whom correspondence should be addressed: [jiangjz@zju.edu.cn](mailto:jiangjz@zju.edu.cn)

## Supplementary Figure

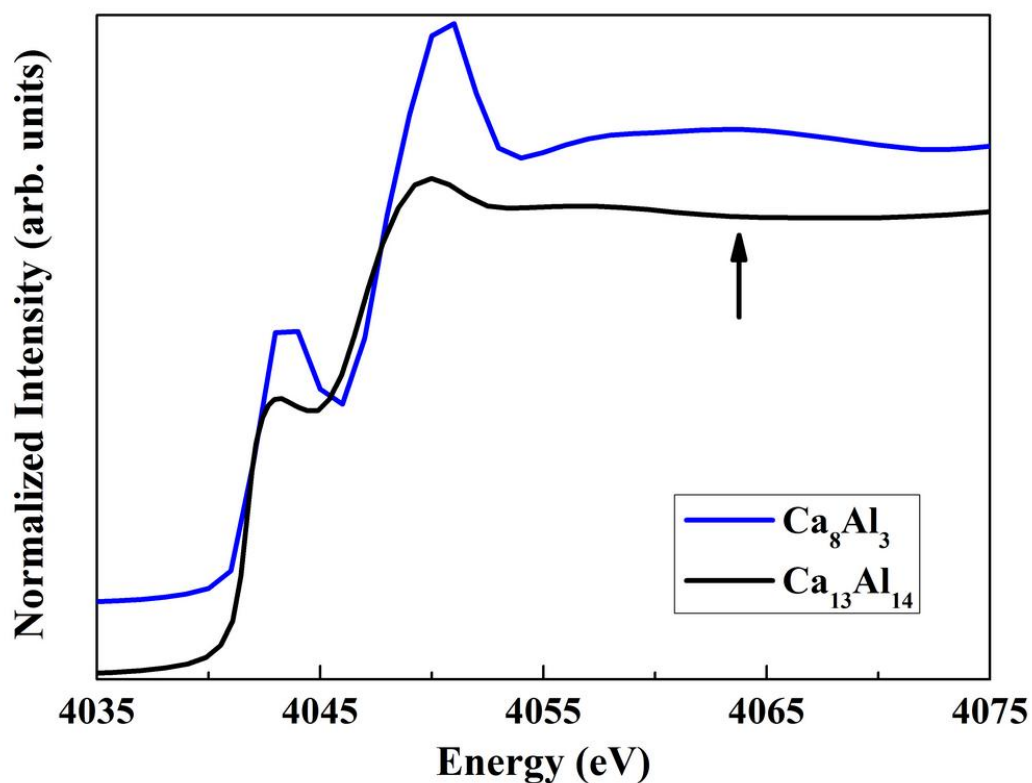

**Supplementary Figure S1.** *K*-edge XANES spectra for  $\text{Ca}_{13}\text{Al}_{14}$  and  $\text{Ca}_8\text{Al}_3$  alloys at ambient pressure obtained by calculations in the framework of the multiple-scattering (MS) theory using the FEFF 8.2 code. Lattice parameters for both  $\text{Ca}_{13}\text{Al}_{14}$  and  $\text{Ca}_8\text{Al}_3$  phases are from Ref. 23 and Ref.24. The intensity of the hump about 15 eV above main peak of  $\text{Ca}_{13}\text{Al}_{14}$  is obviously lower than that of  $\text{Ca}_8\text{Al}_3$ 's.
